# Supplementary material for: A multiple injection method for exerting kinetic control in the synthesis of CdSe nanorodsElectronic supplementary information (ESI) available: multiple injection synthesis procedure. See http://www.rsc.org/suppdata/cc/b4/b409972a/
Source: Royal Society of Chemistry journal article supplement (doi:10.1039/b409972a), 2004-01-01

**Multiple injection synthesis procedure**

Stock **s**olution A: 798 mg of Cd(OAc)2.2H2O and 270 mg of Se powder were dissolved separately in 4 mL each of TOP and the two solutions were mixed and stored.

0.096g CdO, 0.430g TDPA, 3.88g TOPO were loaded in to a 25 mL flask. The mixture was then heated to 320 C under argon flow. Above 300 Cthe reddish CdO powder dissolved and a colorless homogeneous solution was formed. 0.51 mL of a solution of TOPSe (1 M) was diluted with 1.5 mL TOP and injected. The color of the solution turned to orange, and then to wine red. For the first preparation, as soon as the color change occurred, 2 mL of the stock solution A was injected slowly, drop by drop, over a period of 5 minutes [0.4 mL in 1 minute] (injection I). The temperature dropped to 316 C. Heating was continued to maintain the temperature at 320 C. Eight minutes after injection I, 0.5 mL of the reaction mixture was withdrawn. Two minutes later, a further 2 mL of the stock solution A was injected as before (injection II). 0.5mL of the reaction mixture was again withdrawn 13 minutes after injection II. Two minutes later, a 2 mL portion of stock solution A was again injected (injection III). As before, 18 minutes after injection III, 0.5 mL of the reaction mixture was withdrawn. Two minutes later the final injection, IV, was completed. Heating was continued for a further 30 minutes. Finally the reaction mixture was cooled to 70 C and methanol was added to precipitate CdSe. The precipitated CdSe was separated by centrifugation, further washed with methanol and dissolved in toluene. The growth of the particles was monitored by measuring the UV-vis spectra of the samples withdrawn at regular intervals.

To prepare the higher aspect ratio nanorods, the reaction was allowed to proceed for 10 minutes before beginning the addition of stock solution A.

**Figure S1**. STEM images reveal the hexagonal cross-section of rods that are standing on their ends.


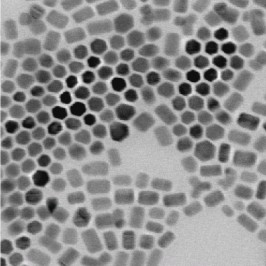

Supplement: b409972a.doc [file b409972a.doc]
